# Supplementary material for: A fluorescence-based method to directly quantify antibodies immobilized on gold nanoparticles
Source: Royal Society of Chemistry journal article supplement (doi:10.1039/c6an00193a), 2016-01-01
Supplement: c6an00193a1.pdf [file c6an00193a1.pdf]

**Supplementary Material for:**

**A fluorescence-based method to directly quantify antibody immobilized on gold nanoparticles**

Seth L. Filbrun and Jeremy D. Driskell\*

Department of Chemistry  
Illinois State University  
Normal, IL USA 61790  
Fax: 309 438 5538  
Tel: 309 438 2663  
E-mail: [jdriske@ilstu.edu](mailto:jdriske@ilstu.edu)

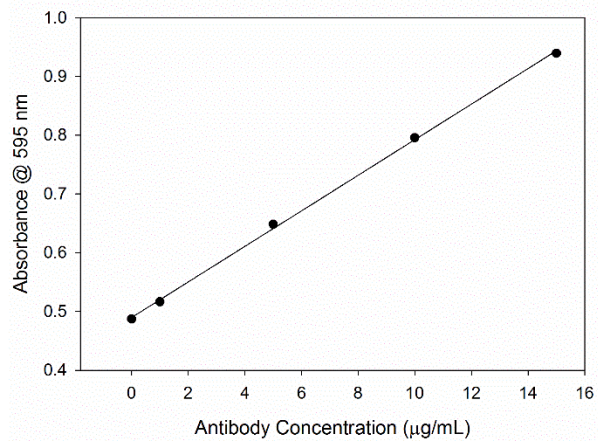

Fig. S1. Bio-Rad protein assay calibration curve for determining antibody concentration in AuNP supernatant.

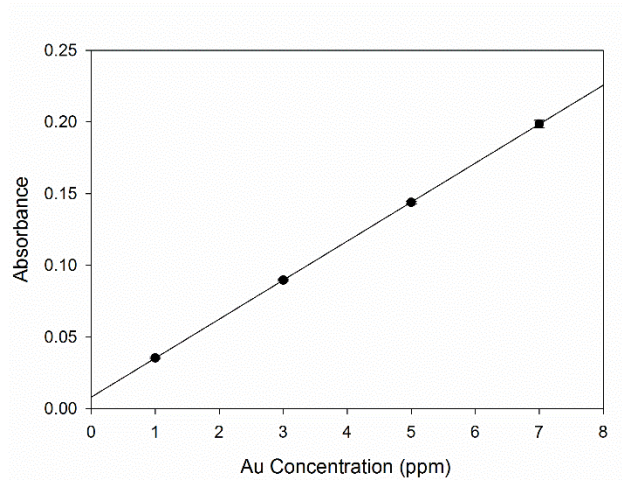

Fig S2. Flame atomic absorption spectroscopy calibration curve for determining gold concentration.

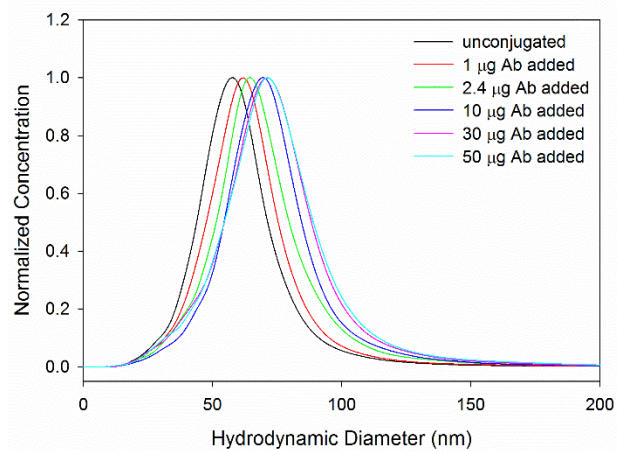

Fig S3. Nanoparticle size distribution curves for AuNP modified with varying amounts of antibody measured with NTA.
